# Supplementary material for: Nanosafety: An Evolving Concept to Bring the Safest Possible Nanomaterials to Society and Environment
Source: MDPI journal article supplement (doi:10.3390/nano12111810), 2022-05-25
Supplement: s1 [file s1]

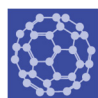

Review

# Nanosafety: an evolving concept to bring the safest possible nanomaterials to society and environment

Filipa Lebre <sup>1</sup>, Nivedita Chatterjee <sup>1</sup>, Samantha Costa <sup>2</sup>, Eli Fernández-de-Gortari <sup>1</sup>, Carla Lopes <sup>1</sup>, João Meneses <sup>1</sup>, Luís Ortiz <sup>3</sup>, Ana R. Ribeiro <sup>1</sup>, Vânia Vilas-Boas <sup>1</sup>, Ernesto Alfaro-Moreno <sup>1,\*</sup>

## Supporting Information

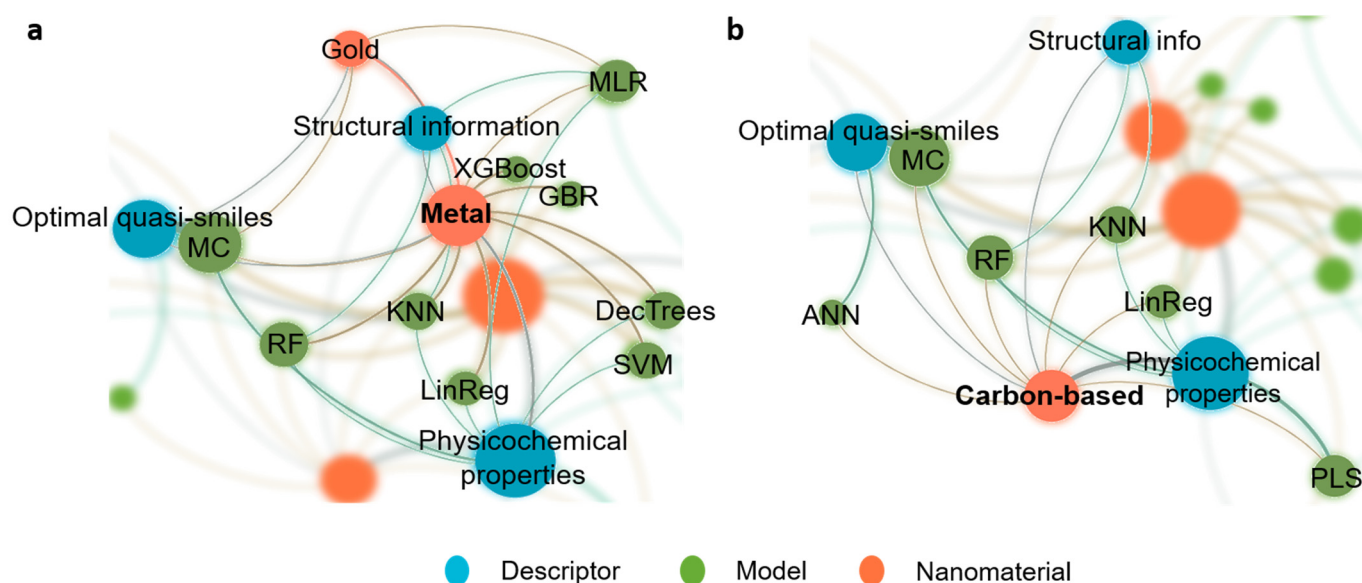

**Figure S1.** Graphical network of the 19 articles that meet the criteria to be included in Table 5. Most relevant connections of (a) metal and (b) carbon-based class. ANN: artificial neural networks; DecTrees: decision trees; GBR: gradient boosting regressor; KNN: k-nearest neighbors; LinReg: linear regression; MC: Monte Carlo; MLR: multiple linear regression; PLS: partial least squares; RF: Random Forest; SVM: support vector machine; XGBoost: extreme gradient boosting
